# Supplementary material
Source: PubMed Central journal article supplement (PMC7056510)

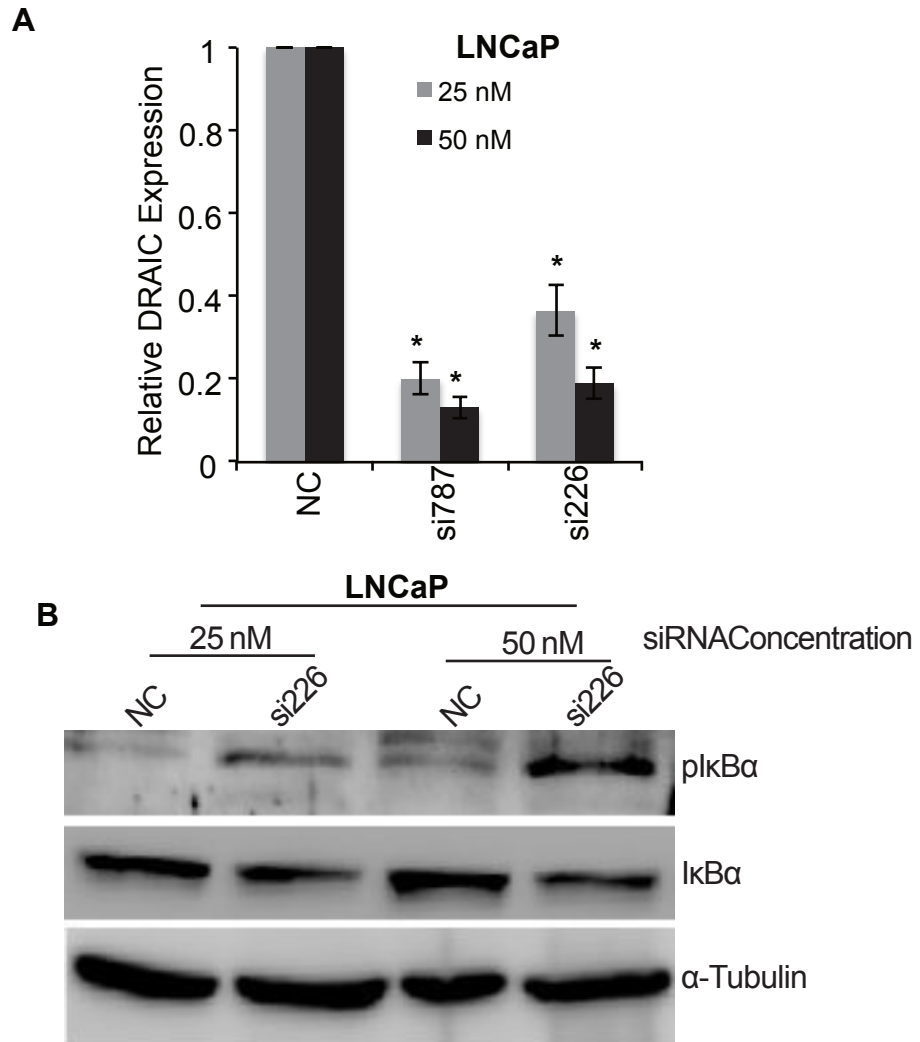

Figure S1

Supplement: NIHMS1547839-supplement-2.pdf [file NIHMS1547839-supplement-2.pdf]

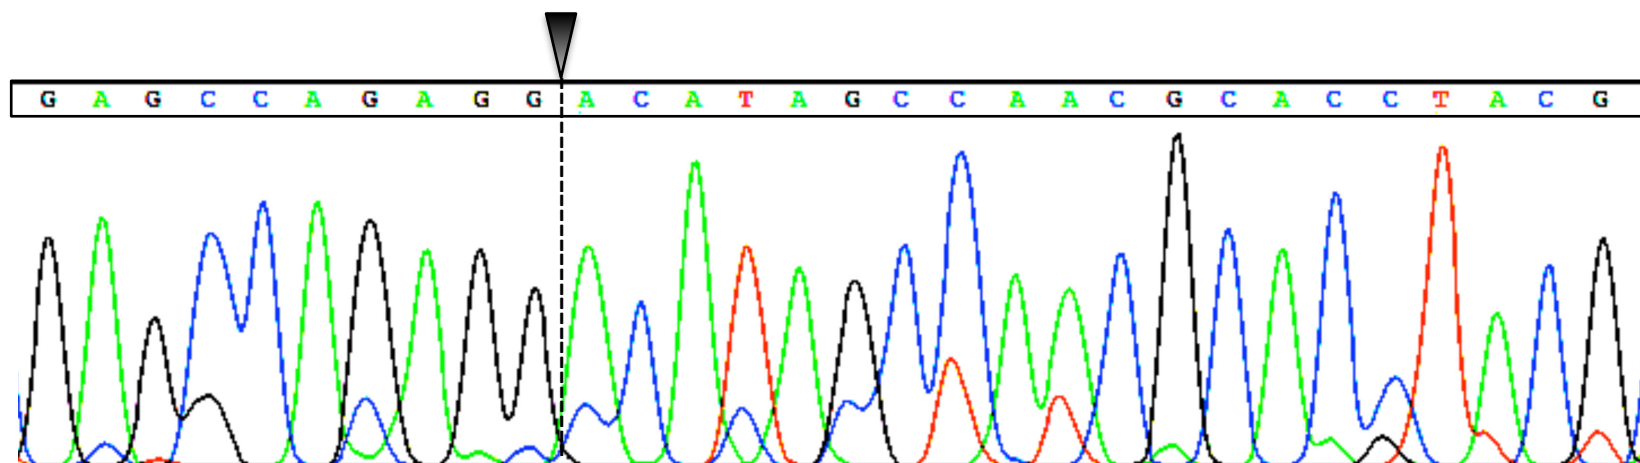

Figure S2

Supplement: NIHMS1547839-supplement-3.pdf [file NIHMS1547839-supplement-3.pdf]

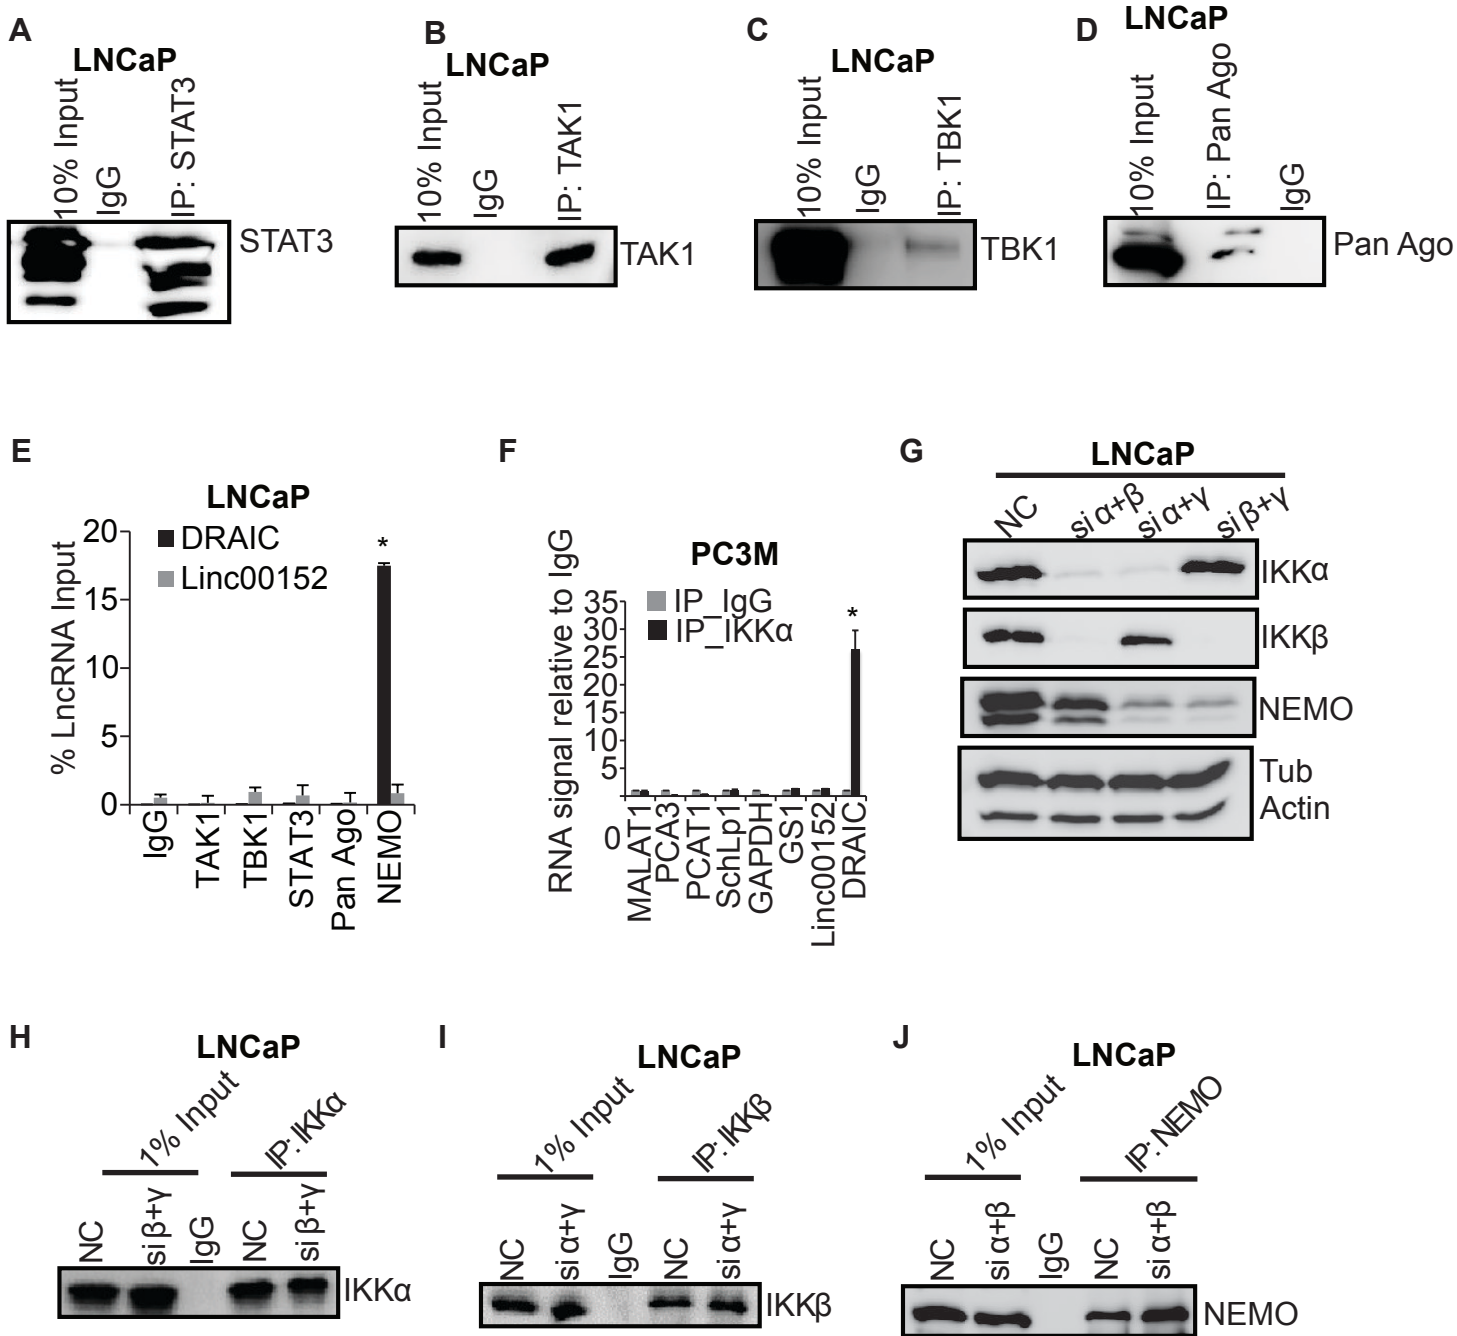

Figure S3

Supplement: NIHMS1547839-supplement-4.pdf [file NIHMS1547839-supplement-4.pdf]

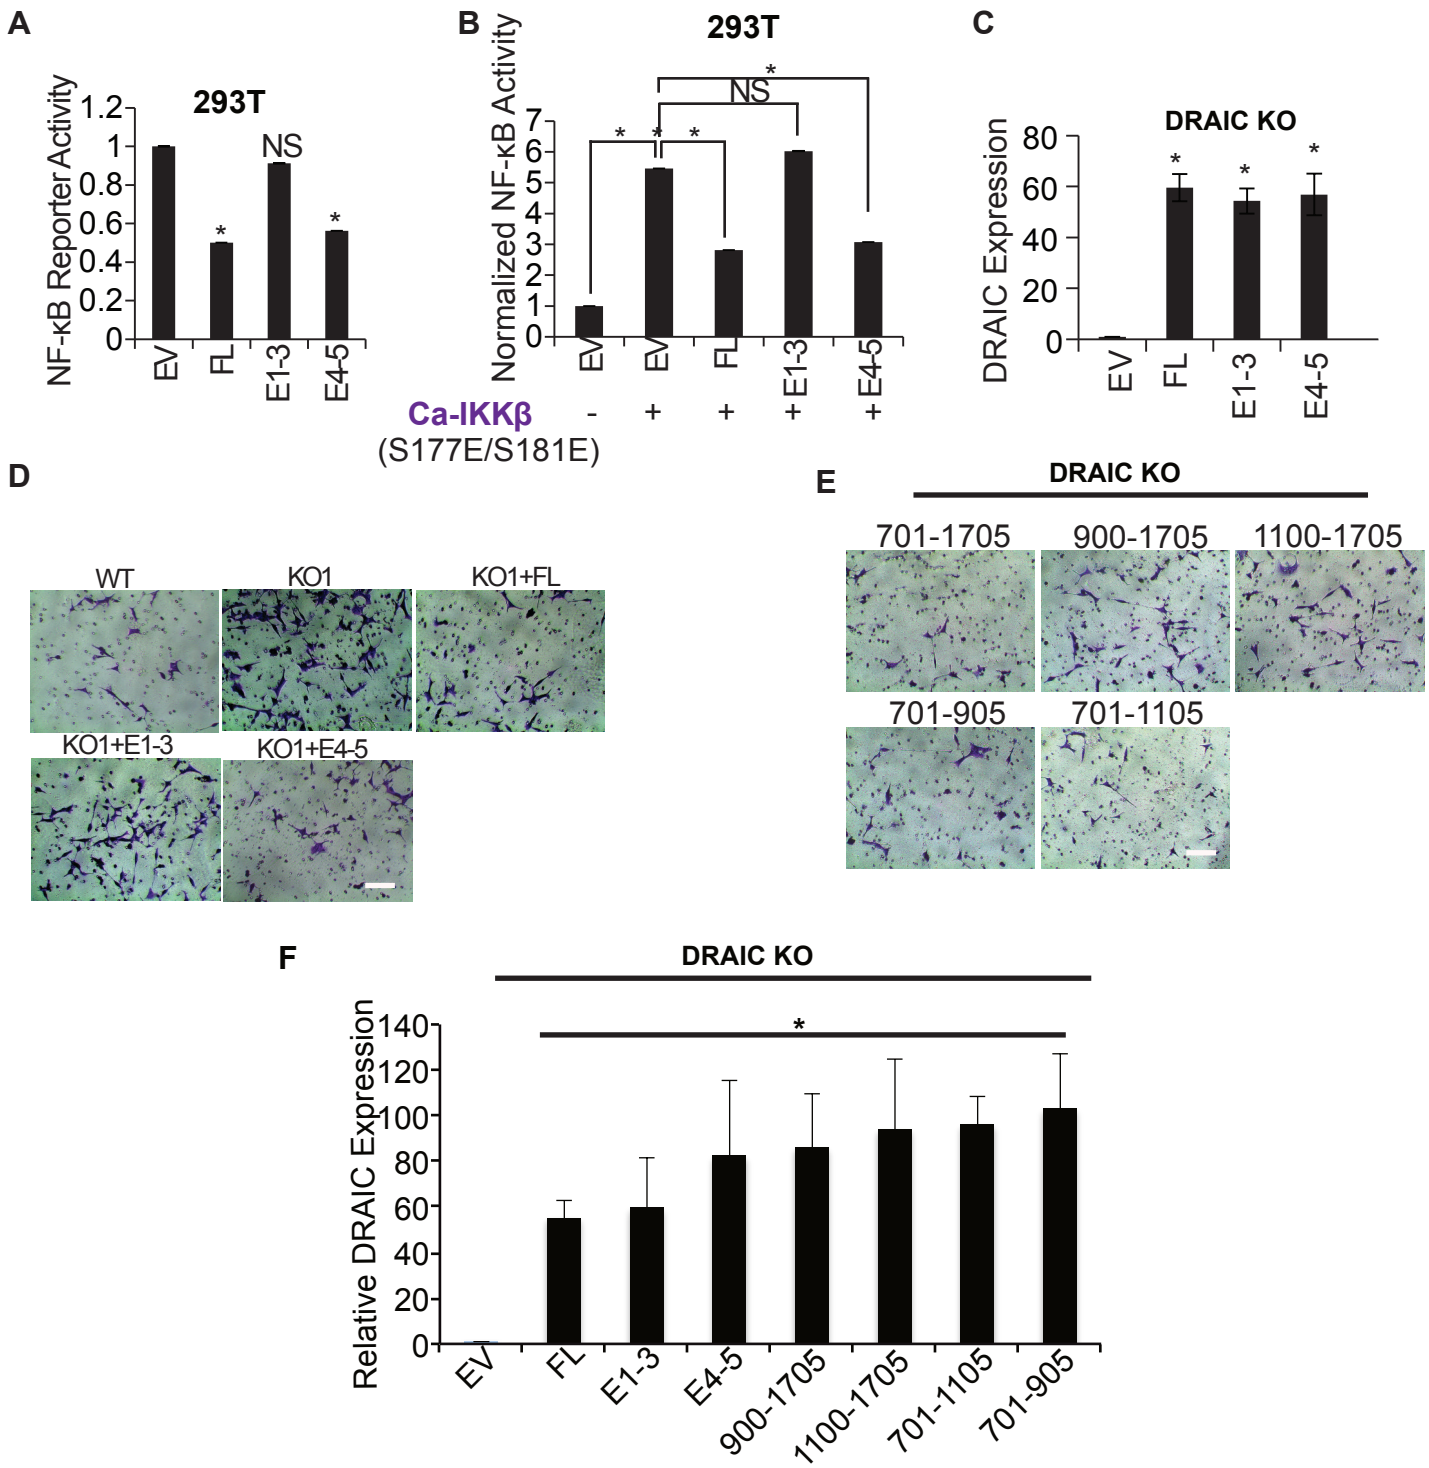

Figure S4

Supplement: NIHMS1547839-supplement-5.pdf [file NIHMS1547839-supplement-5.pdf]
